# Supplementary material for: Construction of CuO/In2S3/ZnO heterostructure arrays for enhanced photocatalytic efficiency
Source: Royal Society of Chemistry journal article supplement (doi:10.1039/c7nr03630b), 2017-01-01
Supplement: c7nr03630b1.pdf [file c7nr03630b1.pdf]

**Supporting Information:**

**Construction of CuO/In<sub>2</sub>S<sub>3</sub>/ZnO heterostructure arrays for  
enhanced photocatalytic efficiency**

*Yu-Cheng Chang\*, Jin-You Guo, Chien-Ming Chen, Hsin-Wei Di, Chao-Chun Hsu*

*Department of Materials Science and Engineering, Feng Chia University, Taichung,*

*40724, Taiwan*

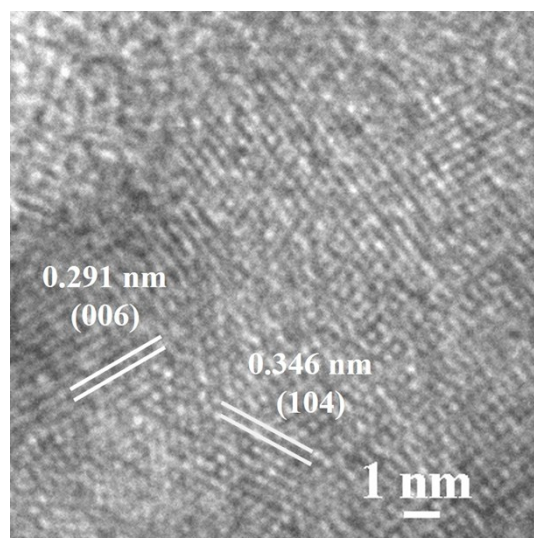

**Fig. S1** The HRTEM image of In<sub>2</sub>S<sub>3</sub> shell in a CuO/In<sub>2</sub>S<sub>3</sub>/ZnO heterostructure (Fig. 5).

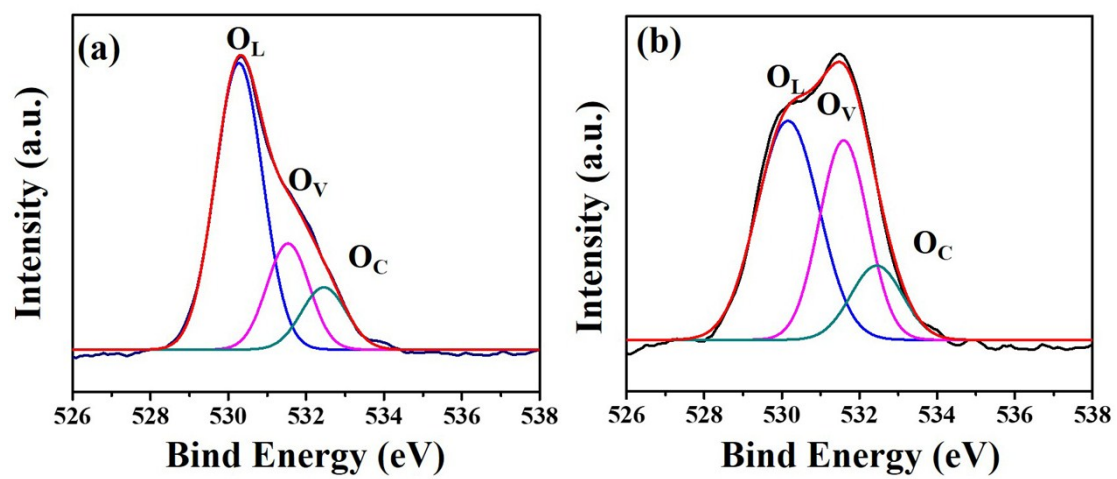

**Fig. S2** XPS spectra of O1s for (a) CuO nanowires and (b) CuO/In<sub>2</sub>S<sub>3</sub>/ZnO heterostructures.

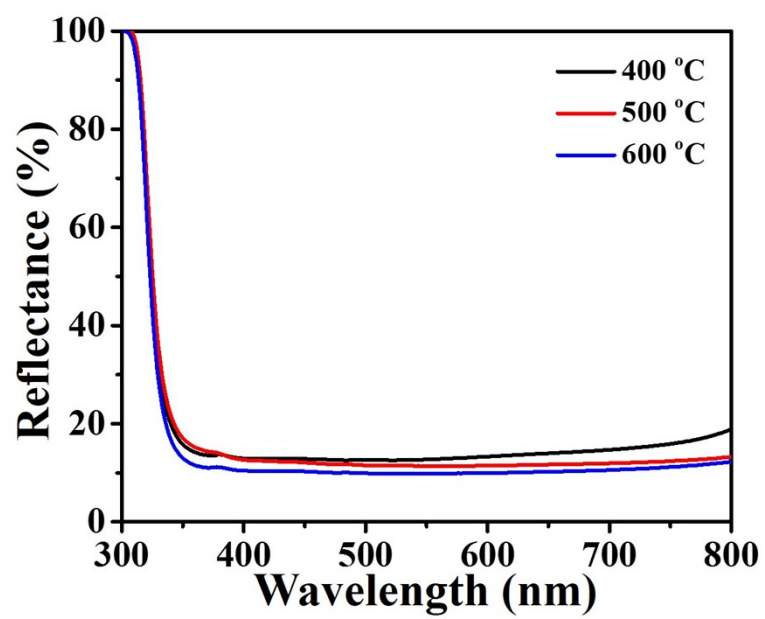

**Fig. S3** The reflection spectra of CuO nanowire arrays were grown on the Cu foils at different growth temperatures for 6h.

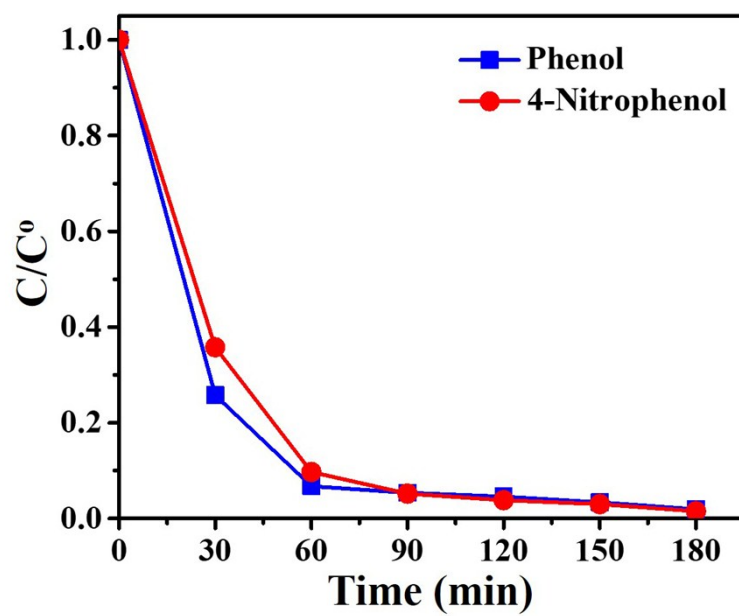

**Fig. S4** Photocatalytic activities of the CuO/In<sub>2</sub>S<sub>3</sub>/ZnO heterostructures for the degradation of phenol and 4-nitrophenol.

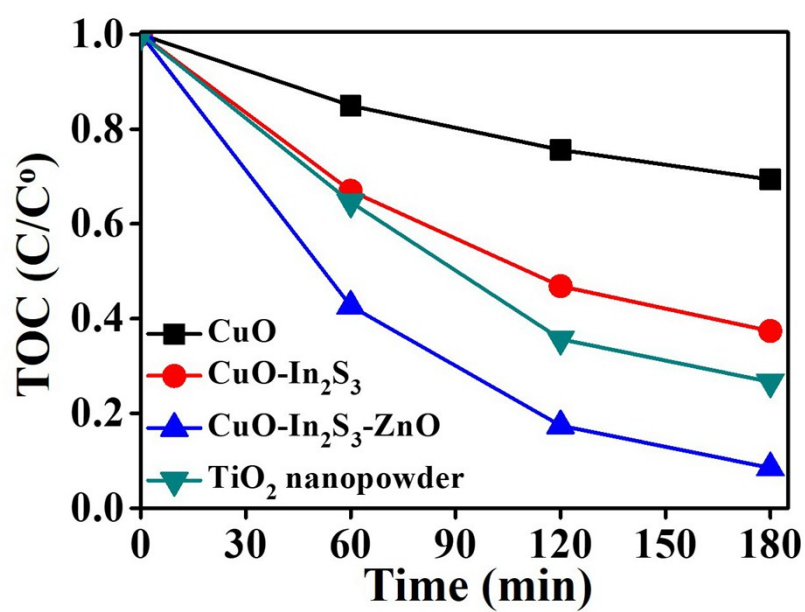

**Fig. S5** Total organic carbon as function of irradiation time for photocatalytic degradation of R6G.

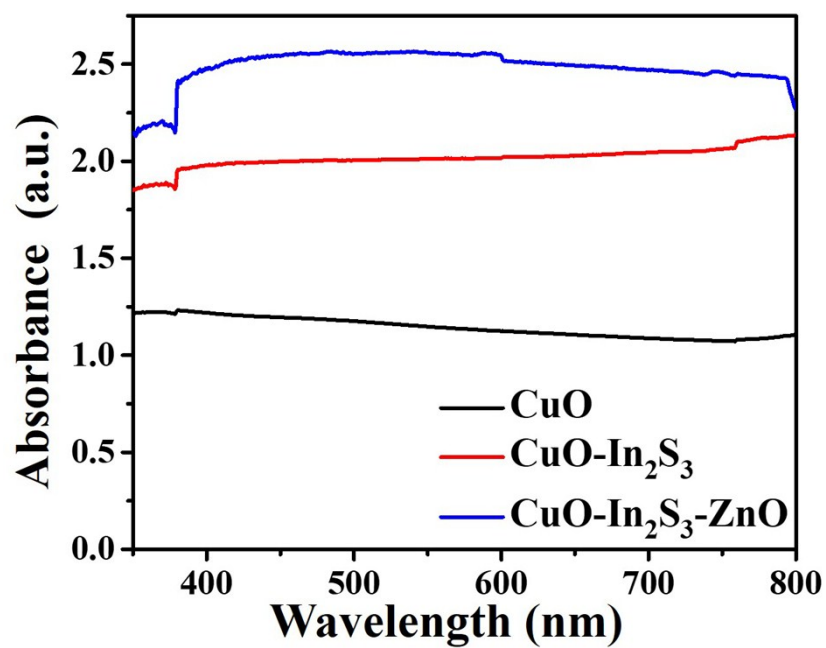

**Fig. S6** The absorbance spectra of powder types of CuO nanowires, CuO/In<sub>2</sub>S<sub>3</sub> heterostructures CuO/In<sub>2</sub>S<sub>3</sub>/ZnO heterostructures.

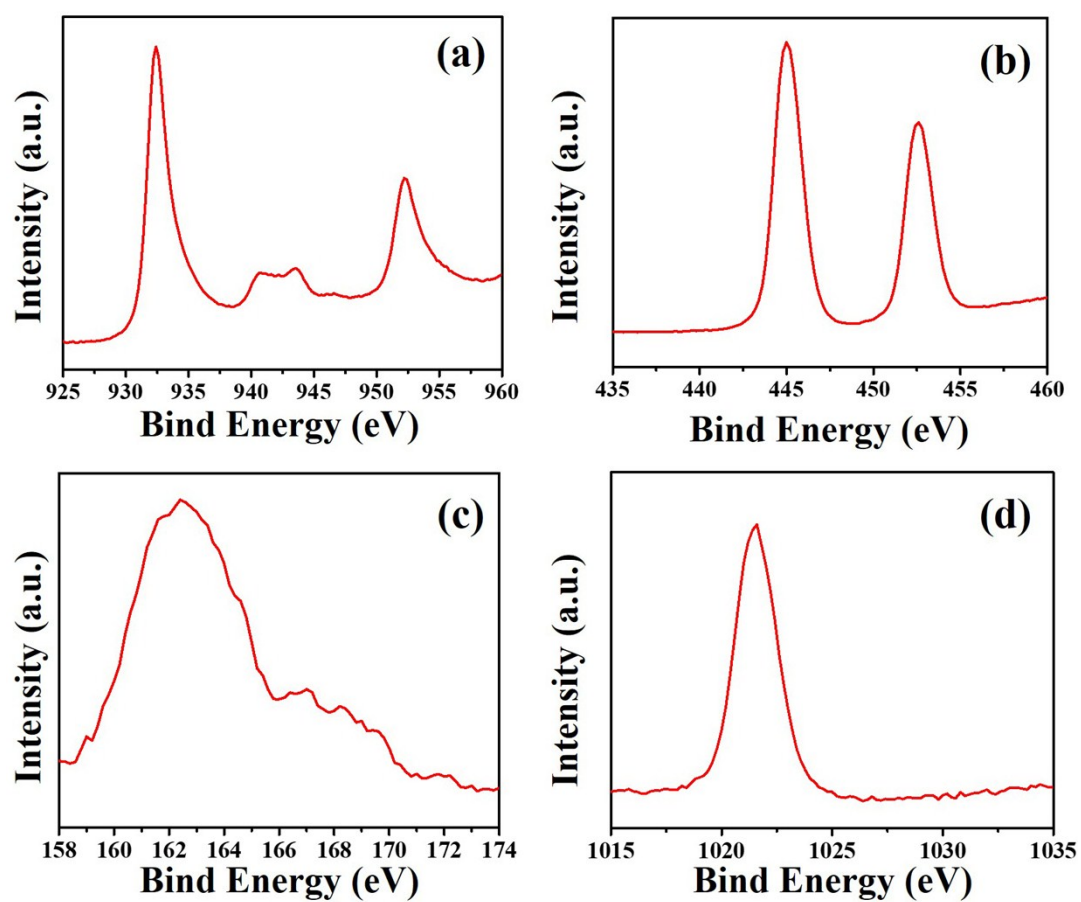

**Fig. S7** XPS spectra of (a) Cu 2p, (b) In 3d, (c) S 2p, and (d) Zn 2p for CuO/In<sub>2</sub>S<sub>3</sub>/ZnO heterostructures.
